# Supplementary material for: Microbiomes of fish, sediment and seagrass suggest connectivity of coral reef microbial populations
Source: PeerJ. 2020 Sep 21;8:e10026. doi: 10.7717/peerj.10026 (PMC7513772; doi:10.7717/peerj.10026)
Supplement: Supplemental Information 1 — Bolded entries are the samples highlighted in Fig. 5. [file peerj-08-10026-s001.xlsx]

## Sheet: Table S1
#OTU ID	SA1	SA2	SA3	SB1	SB2	SB3	SSB1	SSB2	SD1	SD2	SC1	SC2	GB1	GB2	GB3	GB4	SSA1	SSA2	SSA3	GA1	GA2	GA3	GA4	C1	C2	F1	F2	P1	P2	P3	P4	S1	S2	S3	S4
3208	81	195	767	96	1022	100	82	75	1639	435	451	411	16	15	5	1	33	73	151	12	13	9	4	0	762	17	6	7	8	1	2	35	4	20	27	'k__Bacteria', 'p__Cyanobacteria', 'c__Oscillatoriophycideae', 'o__Chroococcales', 'f__Xenococcaceae', 'g__Xenococcus', 's__'
181996	15	11	6	12	16	9	15	15	19	24	27	16	12	124	35	14	16	13	8	19	44	27	27	1111	308	162	272	1447	3308	3979	227	51	123	74	491	'k__Bacteria', 'p__Proteobacteria', 'c__Betaproteobacteria', 'o__Burkholderiales', 'f__Oxalobacteraceae', 'g__Herbaspirillum', 's__'
200274	43	33	18	76	55	36	75	112	7	17	8	10	508	142	9	16	69	40	42	193	31	148	148	0	247	470	483	4	4	2	64	257	168	143	294	'k__Bacteria', 'p__Proteobacteria', 'c__Alphaproteobacteria', 'o__Rhodobacterales', 'f__Rhodobacteraceae', 'g__', 's__'
202518	240	266	302	241	560	315	173	177	8	11	10	5	11	13	10	13	222	221	245	6	18	27	10	751	2726	180	3	3	10	3	2	139	1	372	147	'k__Bacteria', 'p__Cyanobacteria', 'c__Chloroplast', 'o__', 'f__', 'g__', 's__'
221560	6	9	5	16	15	6	36	13	2	5	1	3	88	3	8	2	13	14	10	32	65	97	113	276	1	139	2	1	3	2	0	91	44	107	0	'k__Bacteria', 'p__Proteobacteria', 'c__Alphaproteobacteria', 'o__', 'f__', 'g__', 's__'
251481	54	40	24	141	52	41	112	78	49	84	37	55	581	100	12	18	96	66	42	240	74	371	142	334	326	1369	3162	17	10	943	203	1145	1003	1618	2012	'k__Bacteria', 'p__Proteobacteria', 'c__Alphaproteobacteria', 'o__Rhodobacterales', 'f__Rhodobacteraceae', 'g__', 's__'
364960	6	5	4	22	14	9	13	20	2	4	2	4	168	195	3	7	24	12	13	161	31	139	143	1	2	32	205	1	0	1	0	45	1	6	86	'k__Bacteria', 'p__Proteobacteria', 'c__Alphaproteobacteria', 'o__Rhodobacterales', 'f__Rhodobacteraceae', 'g__', 's__'
369920	13	5	4	29	13	9	44	20	4	6	5	3	19	0	6	4	14	29	24	18	5	184	50	14	4	436	496	3	4	3	1	394	455	569	966	'k__Bacteria', 'p__Proteobacteria', 'c__Alphaproteobacteria', 'o__Rhodobacterales', 'f__Rhodobacteraceae', 'g__', 's__'
369965	1	6	3	22	10	7	7	59	9	10	9	9	252	102	9	1	18	12	14	267	25	269	160	133	252	307	23	1	2	2	20	579	0	113	54	k__Bacteria', 'p__Proteobacteria', 'c__Alphaproteobacteria', 'o__Rhizobiales', 'f__Phyllobacteriaceae', 'g__', 's__'
396109	7	2	3	6	2	4	5	6	2	5	28	5	3	10	5	1	2	2	2	3	10	2	6	1	5	6	8	13001	9	2	2	15	38	3	5	'k__Bacteria', 'p__Bacteroidetes', 'c__Flavobacteriia', 'o__Flavobacteriales', 'f__[Weeksellaceae]', 'g__Cloacibacterium', 's__'
435644	30	17	19	41	16	21	52	55	5	9	3	4	705	54	2	3	26	31	17	574	14	442	130	2	95	308	245	5	4	298	5	267	4	103	5	'k__Bacteria', 'p__Proteobacteria', 'c__Alphaproteobacteria', 'o__Rhodobacterales', 'f__Rhodobacteraceae', 'g__', 's__'
439036	11	5	6	6	14	12	9	9	24	22	118	16	3	24	23	10	8	13	14	8	22	10	21	2	11	22	20	23672	71	10	2	31	763	6	3	'k__Bacteria', 'p__Actinobacteria', 'c__Actinobacteria', 'o__Actinomycetales', 'f__Corynebacteriaceae', 'g__Corynebacterium', 's__'
512212	20	16	14	40	50	15	72	92	8	10	2	5	164	20	5	6	46	23	21	73	1	76	63	202	393	186	55	5	5	1	60	152	336	294	299	k__Bacteria', 'p__Proteobacteria', 'c__Alphaproteobacteria', 'o__Rhodobacterales', 'f__Rhodobacteraceae', 'g__Anaerospora', 's__'
543864	82	94	93	76	135	106	102	98	107	154	200	140	94	1431	273	130	90	108	116	144	462	169	158	7530	4629	1330	5154	13131	31152	15470	1831	500	3722	525	2626	'k__Bacteria', 'p__Proteobacteria', 'c__Gammaproteobacteria', 'o__Pseudomonadales', 'f__Pseudomonadaceae', 'g__Pseudomonas', 's__'
552812	503	416	251	591	592	115	333	335	398	441	228	347	211	38	10	19	185	338	294	202	27	45	91	0	82	61	2	6	13	2	4	45	3	38	0	'k__Bacteria', 'p__Cyanobacteria', 'c__Chloroplast', 'o__Stramenopiles', 'f__', 'g__', 's__'
563273	13	27	13	15	19	19	20	23	25	28	23	16	13	101	24	10	17	31	16	28	79	28	37	112	80	61	74	224	604	260	38	51	69	20	43	'k__Bacteria', 'p__Proteobacteria', 'c__Gammaproteobacteria', 'o__Pseudomonadales', 'f__Pseudomonadaceae', 'g__Pseudomonas', 's__'
579531	1524	979	712	1401	1550	303	1060	1008	1635	1643	1102	1165	663	134	35	39	524	953	699	855	34	278	357	3	266	97	6	11	10	4	8	139	1	46	1	'k__Bacteria', 'p__Cyanobacteria', 'c__Chloroplast', 'o__Stramenopiles', 'f__', 'g__', 's__'
589014	4	5	1	6	7	0	11	7	3	6	0	3	30	3	2	2	7	8	4	9	3	16	5	38	40	68	55	1	1	8	4	61	241	66	108	'k__Bacteria', 'p__Proteobacteria', 'c__Alphaproteobacteria', 'o__Rhodobacterales', 'f__Rhodobacteraceae', 'g__', 's__'
589488	101	77	98	122	167	84	133	91	105	126	70	165	19	3	14	15	142	87	162	11	9	13	7	1	481	113	98	2	8	1	0	239	1	78	102	'k__Bacteria', 'p__Proteobacteria', 'c__Alphaproteobacteria', 'o__Rhizobiales', 'f__Cohaesibacteraceae', 'g__', 's__'
592750	2	2	6	3	3	4	6	2	1	1	5	4	50	7	3	1	6	0	4	12	37	2	1293	582	110	723	2	1	6	3	1	141	1	64	2	'k__Bacteria', 'p__Cyanobacteria', 'c__Oscillatoriophycideae', 'o__Oscillatoriales', 'f__Phormidiaceae', 'g__', 's__'
633420	80	91	31	106	65	83	119	54	7	27	5	18	18	2	16	15	114	68	96	14	2	18	20	1	591	50	168	2	3	0	2	158	2	581	0	'k__Bacteria', 'p__Proteobacteria', 'c__Alphaproteobacteria', 'o__Rhizobiales', 'f__Hyphomicrobiaceae', 'g__', 's__'
750018	5	6	11	10	11	9	6	11	7	3	28	17	5	118	14	6	7	8	14	8	25	9	12	658	180	94	110	758	2045	751	94	16	429	42	288	'k__Bacteria', 'p__Proteobacteria', 'c__Gammaproteobacteria', 'o__Pseudomonadales', 'f__Pseudomonadaceae', 'g__Pseudomonas', 's__veronii'
762487	23	26	8	37	22	14	53	29	7	17	7	10	28	14	17	10	37	29	48	13	2	8	4	0	213	197	245	2	4	1	0	291	20	227	140	'k__Bacteria', 'p__Proteobacteria', 'c__Alphaproteobacteria', 'o__Rhizobiales', 'f__Hyphomicrobiaceae', 'g__', 's__'
815169	29	20	78	25	31	11	31	37	23	24	25	22	248	18663	1049	263	22	32	57	439	48695	1247	4513	6	18	20	24	37	160	186	12	25	7	11	7	'k__Bacteria', 'p__Cyanobacteria', 'c__Chloroplast', 'o__Streptophyta', 'f__', 'g__', 's__'
868948	14	7	6	28	13	13	48	17	1	12	6	6	34	0	10	11	13	28	7	13	5	11	20	94	306	706	507	4	5	2	0	621	4	1095	278	'k__Bacteria', 'p__Proteobacteria', 'c__Alphaproteobacteria', 'o__Rhodobacterales', 'f__Rhodobacteraceae', 'g__', 's__'
1011088	8	6	1	25	6	5	19	34	3	3	4	5	277	140	4	6	17	25	11	177	42	131	125	0	89	162	281	1	4	37	7	115	1	79	39	'k__Bacteria', 'p__Proteobacteria', 'c__Alphaproteobacteria', 'o__Rhodobacterales', 'f__Rhodobacteraceae', 'g__', 's__'
1029559	270	162	135	266	305	86	235	241	217	235	128	197	50	28	6	11	123	221	230	85	11	57	60	2	286	194	2	3	0	3	0	143	1	170	1	'k__Bacteria', 'p__Cyanobacteria', 'c__Chloroplast', 'o__Stramenopiles', 'f__', 'g__', 's__'
1088265	9	8	7	4	4	3	12	10	3	11	11	8	6	158	13	8	2	8	8	3	29	6	14	181	254	38	148	431	3902	184	106	17	232	64	52	'k__Bacteria', 'p__Actinobacteria', 'c__Actinobacteria', 'o__Actinomycetales', 'f__Propionibacteriaceae', 'g__Propionibacterium', 's__acnes'
1109647	458	249	252	539	459	87	265	346	679	759	463	498	162	44	3	8	141	211	180	103	11	27	64	1	91	45	2	5	2	1	5	69	4	9	1	'k__Bacteria', 'p__Cyanobacteria', 'c__Chloroplast', 'o__Stramenopiles', 'f__', 'g__', 's__'
3390990	99	53	55	110	110	52	98	73	32	27	29	54	12	41	1	4	83	75	93	8	2	17	10	257	757	456	314	2	0	1	1	341	6	356	26	'k__Bacteria', 'p__Planctomycetes', 'c__Planctomycetia', 'o__Pirellulales', 'f__Pirellulaceae', 'g__', 's__'
4306428	3	2	3	15	3	4	16	38	2	1	2	4	289	799	3	3	39	28	4	467	56	800	219	2	1	17	4	2	0	3	51	46	1	36	1	'k__Bacteria', 'p__Proteobacteria', 'c__Alphaproteobacteria', 'o__Rhodobacterales', 'f__Rhodobacteraceae', 'g__', 's__'
4412860	28	21	80	15	26	15	33	26	20	30	38	28	141	13759	859	192	26	26	35	341	32928	886	2978	8	15	16	22	28	186	145	13	23	5	5	9	'k__Bacteria', 'p__Cyanobacteria', 'c__Chloroplast', 'o__Streptophyta', 'f__', 'g__', 's__'
4425566	3	2	3	11	6	5	5	3	2	4	4	3	131	8	3	1	7	7	1	34	3	38	18	3	1	200	206	3	4	406	22	66	0	144	47	'k__Bacteria', 'p__Proteobacteria', 'c__Alphaproteobacteria', 'o__Rhodobacterales', 'f__Rhodobacteraceae', 'g__', 's__'
4456340	20	13	32	33	34	16	61	83	9	9	6	7	371	49	2	2	38	26	50	223	18	243	170	2	2	201	3	0	2	182	1	108	1	0	1	'k__Bacteria', 'p__Proteobacteria', 'c__Alphaproteobacteria', 'o__Rhodobacterales', 'f__Rhodobacteraceae', 'g__', 's__'
